# Supplementary material for: SHH Protein Variance in the Limb Bud Is Constrained by Feedback Regulation and Correlates with Altered Digit Patterning
Source: PubMed Central journal article supplement (PMC5345715; doi:10.1534/g3.116.033019), 2017-01-26

Fig. S1

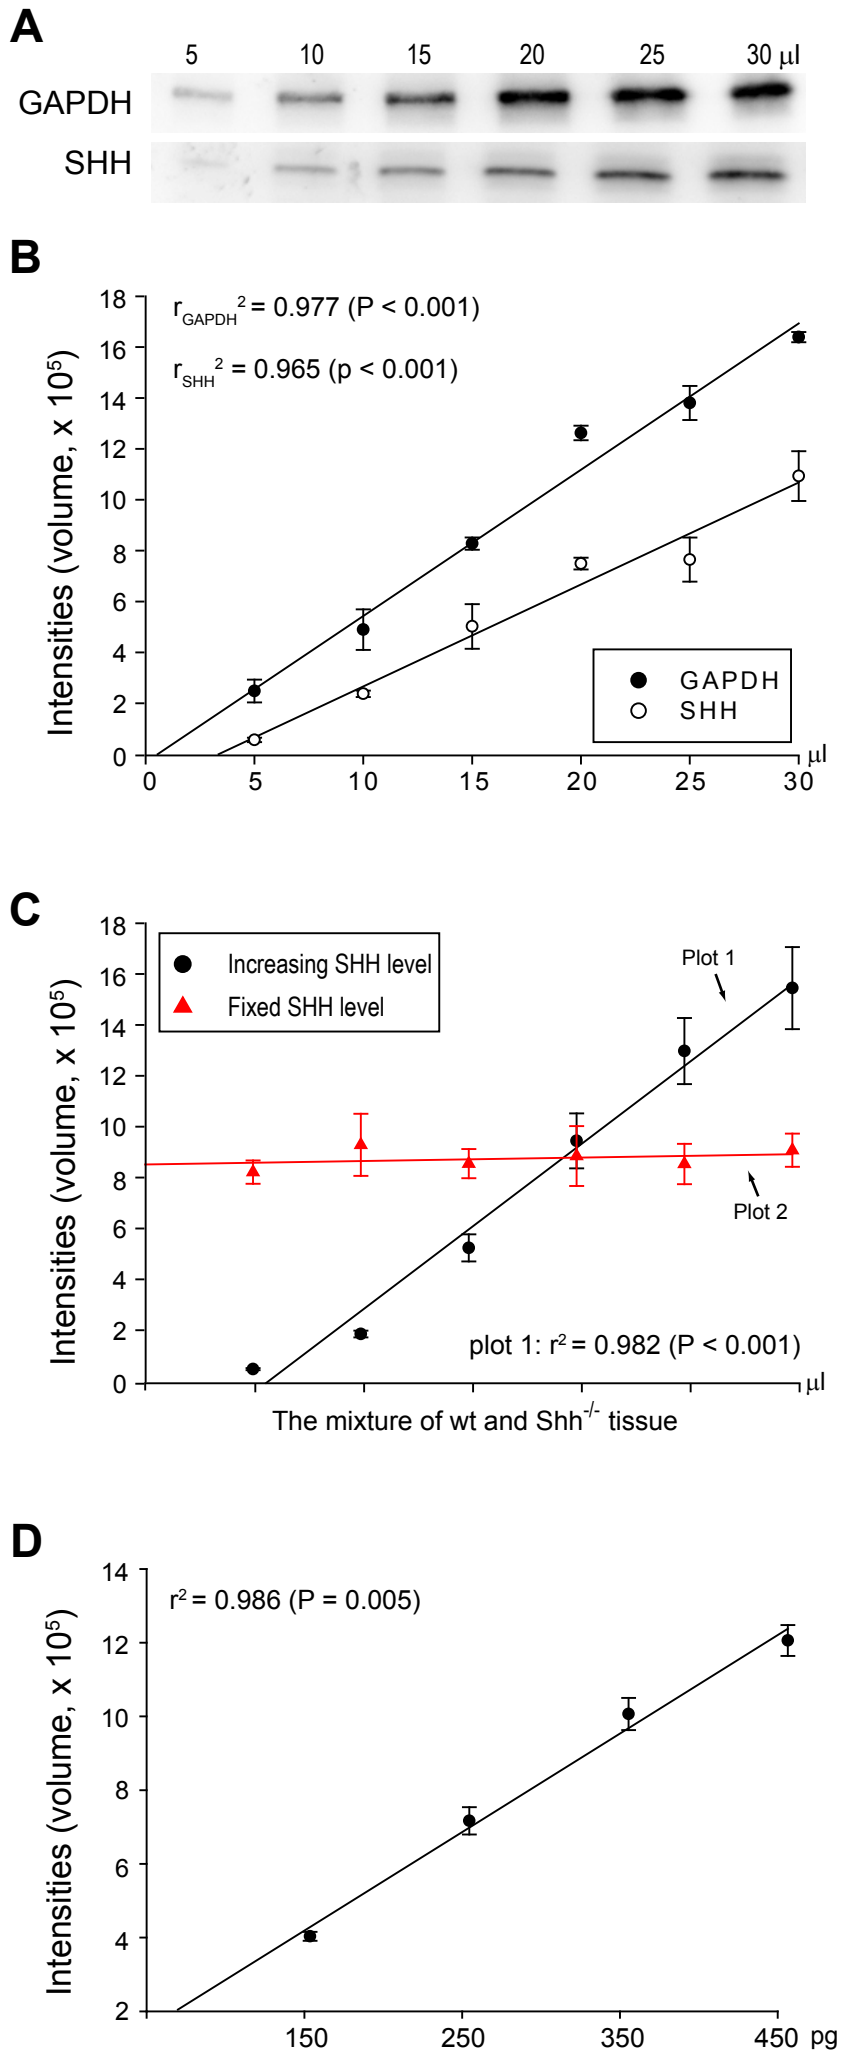

Supplement: 851FigureS1.pdf [file 851FigureS1.pdf]
